# Supplementary material for: Co–N/C-900 metal–organic framework-derived nanozyme as a H2O2-free oxidase mimic for the colorimetric sensing of l-cysteine
Source: Royal Society of Chemistry journal article supplement (doi:10.1039/d1an02179f), 2022-01-01
Supplement: d1an02179f1.pdf [file d1an02179f1.pdf]

## Supplementary Information

### **Co-N/C-900 Metal-Organic Framework-Derived Nanozyme as H<sub>2</sub>O<sub>2</sub>- Free Oxidase Mimic for Colorimetric Sensing of L-Cysteine**

Jian Chen, Song Hu, Yongliang Cai, Xia Liu, Yueqi Wu, Yihu Dai, Zhijuan Wang\*

*Institute of Advanced Synthesis (IAS), School of Chemistry and Molecular Engineering (SCME), Jiangsu National Synergetic Innovation Center for Advanced Materials (SICAM), Nanjing Tech University, 30 South Puzhu Road, Nanjing 211816, PR China*

E-mail: [ias\\_zjwang@njtech.edu.cn](mailto:ias_zjwang@njtech.edu.cn)

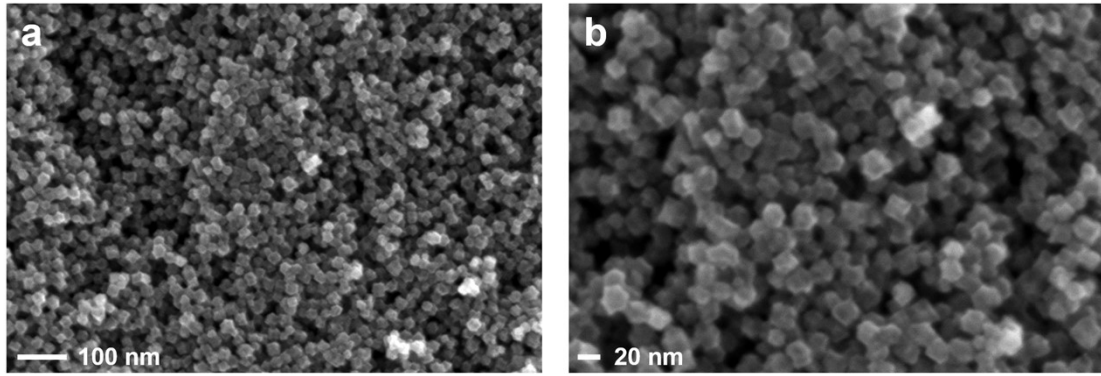

Figure S1. SEM images of Co-N/C-900 with different magnification.

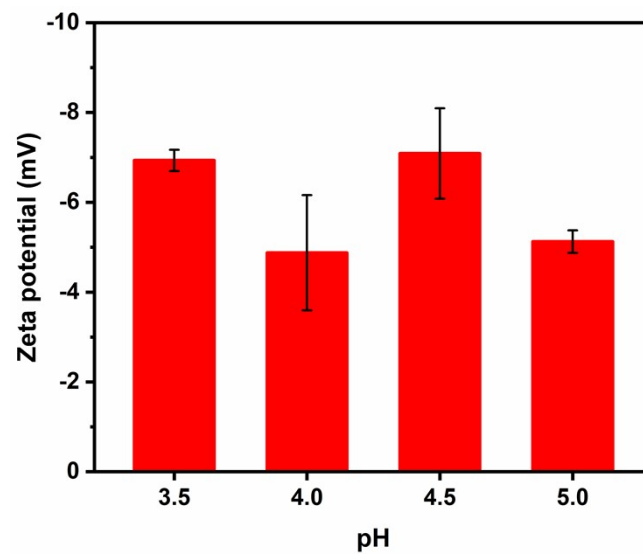

Figure S2. The effect of pH on the zeta potential of Co-N/C-900.

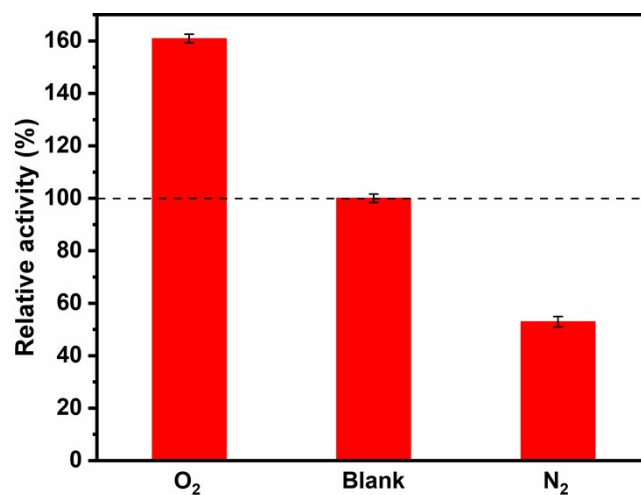

**Figure S3.** The catalytic oxidation of TMB in the presence of O<sub>2</sub> and N<sub>2</sub>. Reaction conditions: 4 mg/mL Co-N/C-900, 0.1 M acetate buffer (pH 4, bubbled with O<sub>2</sub>/N<sub>2</sub> for 15 min), 20 mM TMB, 20 °C for 10 min incubation

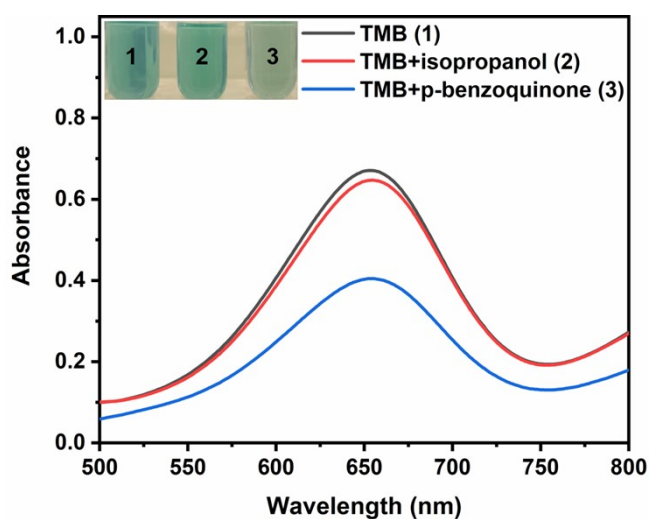

**Figure S4.** UV-vis absorption spectra of TMB (1) and TMB in the presence of isopropanol (2) and p-benzoquinone (3), respectively. Inset: color contrast photograph of the above three systems. Reaction conditions: 4 mg/mL Co-N/C-900, 10 mM isopropanol/p-benzoquinone, 0.1 M acetate buffer (pH 4), 20 mM TMB, 20 °C for 10 min incubation.
